# Supplementary material for: Anti-Glucosylsphingosine Autoimmunity, JAK2V617F-Dependent Interleukin-1β and JAK2V617F-Independent Cytokines in Myeloproliferative Neoplasms
Source: Cancers (Basel). 2020 Aug 28;12(9):2446. doi: 10.3390/cancers12092446 (PMC7564615; doi:10.3390/cancers12092446)
Supplement: Supplementary file 1 [file cancers-12-02446-s001.pdf]

## Article

# Anti-Glucosylsphingosine Autoimmunity, JAK2V617F-Dependent Interleukin-1 $\beta$ and JAK2V617F-Independent Cytokines in Myeloproliferative Neoplasms

Sophie Allain-Maillet, Adrien Bosseboeuf, Nicolas Mennesson, Mégane Bostoën, Laura Dufeu, Eun Ho Choi, Cédric Cleyrat, Olivier Mansier, Eric Lippert, Yannick Le Bris, Jean-Marc Gombert, François Girodon, Magali Pettazzoni, Edith Bigot-Corbel and Sylvie Hermouet

## Supplementary Materials:

**Table S1.** Correlations between %JAK2V617F and blood counts in JAK2V617F-mutated MPN patients.

| Blood Parameter                   | All MPNs |        |         | PV |        |         | ET |   |         | PMF |   |         |
|-----------------------------------|----------|--------|---------|----|--------|---------|----|---|---------|-----|---|---------|
|                                   | n        | r      | p value | n  | r      | p value | n  | r | P value | n   | r | p value |
| Leukocytes (x10 <sup>9</sup> /L)  | 53       | 0.4015 | 0.0029  | 25 | 0.7266 | <0.0001 | -  | - | -       | -   | - | -       |
| Neutrophils (x10 <sup>9</sup> /L) | 51       | 0.4321 | 0.0015  | 24 | 0.7885 | <0.0001 | -  | - | -       | -   | - | -       |
| Monocytes (x10 <sup>9</sup> /L)   | -        | -      | -       | 25 | 0.4018 | 0.0465  | -  | - | -       | -   | - | -       |
| Hematocrit (L/L)                  | -        | -      | -       | -  | -      | -       | -  | - | -       | -   | - | -       |
| Hemoglobin (g/dL)                 | -        | -      | -       | -  | -      | -       | -  | - | -       | -   | - | -       |
| Platelets (x10 <sup>9</sup> /L)   | -        | -      | -       | -  | -      | -       | -  | - | -       | -   | - | -       |

- : non-significant.

**Table S2.** Characteristics of ET patients with JAK2V617F or CALR mutation.

|                         | JAK2V617F –Mutated ET   | CALR –Mutated ET |
|-------------------------|-------------------------|------------------|
| <b>Number</b>           | 21                      | 15               |
| <b>Sex, M/F (male%)</b> | 8/13 (38.1%)            | 7/8 (46.7%)      |
| <b>Age (Yr)</b>         |                         |                  |
| Median                  | 68.0                    | 61.1             |
| Range                   | (43.0–95.0)             | (41.2–85.8)      |
| <b>%JAK2V617F</b>       |                         |                  |
| Median                  | 13.0                    | 0                |
| Range                   | (4.0–61.0) <sup>a</sup> | (0–0)            |
| <b>Blood Counts</b>     |                         |                  |
| Hematocrit (L/L)        |                         |                  |
| Median                  | 46.2                    | 42.9*            |
| Range                   | (35.5–63.3)             | (35.3–48.3)      |
| Hemoglobin (g/dL)       |                         |                  |

|                                  |             |             |
|----------------------------------|-------------|-------------|
| Median                           | 14.8        | 14.0        |
| Range                            | (10.4–20.0) | (11.6–11.6) |
| Leukocytes (x10 <sup>9</sup> /L) |             |             |
| Median                           | 9.1         | 7.9         |
| Range                            | (4. –41.0)  | (5.3–15.4)  |
| Platelets (x10 <sup>9</sup> /L)  |             |             |
| Median                           | 615         | 808**       |
| Range                            | (191–1,851) | (360–2,300) |

(a) Patient with myelofibrosis; \* $p = 0.0333$  and \*\* $p = 0.0510$  vs JAK2V617F-mutated ET, Mann-Whitney  $t$ -test.

**Table S3.** Characteristics of MPN patients with GlcSph-reactive IgGs.

|                                              | All Patients  | PV            | ET            | PMF         |
|----------------------------------------------|---------------|---------------|---------------|-------------|
| <b>Patients with GlcSph-reactive IgGs</b>    |               |               |               |             |
| <b>Number</b>                                | 15            | 3             | 8             | 4           |
| <b>Sex, M/F (male%)</b>                      | 6/9 (40.0%)   | 2/1 (66.7%)   | 2/6 (25.0%)   | 2/2 (50.0%) |
| <b>Age (Yr)</b>                              |               |               |               |             |
| Median                                       | 67.0          | 67.0          | 67.4          | 64.0        |
| (Range)                                      | (33–95)       | (33–76)       | (41–95)       | (50–73)     |
| <b>%JAK2V617F</b>                            |               |               |               |             |
| Median                                       | 16.0          | 25.0          | 0             | 27.0        |
| (Range)                                      | (0–96)        | (17.0–96)     | (0–34)        | (0–37)      |
| <b>Blood Counts</b>                          |               |               |               |             |
| Hematocrit (L/L)                             |               |               |               |             |
| Median                                       | 42.6          | 48.7          | 42.9          | 37.4        |
| (Range)                                      | (29.3–63.3)   | (43.1–52.2)   | (35.3–63.3)   | (29.3–41.0) |
| Hemoglobin (g/dL)                            |               |               |               |             |
| Median                                       | 14.0          | 14.1          | 14.0          | 11.6        |
| (Range)                                      | (9.6–20.0)    | (13.8–16.7)   | (11.6–20.0)   | (9.6–13.0)  |
| Leukocytes (x10 <sup>9</sup> /L)             |               |               |               |             |
| Median                                       | 7.3           | 7.8           | 6.9           | 6.5         |
| (Range)                                      | (4.5–37.8)    | (7.3–37.8)    | (4.5–15.4)    | (5.0–12.5)  |
| Platelets (x10 <sup>9</sup> /L)              |               |               |               |             |
| Median                                       | 483           | 349           | 765           | 116         |
| (Range)                                      | (47–2,300)    | (239–493)     | (191–2,300)   | (47–483)    |
| <b>Patients without GlcSph-reactive IgGs</b> |               |               |               |             |
| <b>Number</b>                                | 60            | 24            | 31            | 5           |
| <b>Sex, M/F (male%)</b>                      | 32/28 (53.3%) | 14/10 (58.3%) | 13/18 (41.9%) | 5/0 (100%)  |
| <b>Age (Yr)</b>                              |               |               |               |             |
| Median                                       | 67.0          | 69.0          | 62.0          | 80.0        |
| (Range)                                      | (37–93)       | (37–93)       | (37–93)       | (69–86)     |
| <b>%JAK2V617F</b>                            |               |               |               |             |
| Median                                       | 15.5          | 17.6          | 14.4          | 10.5        |
| (Range)                                      | (7.9–22.4)    | (15.5–22.4)   | (10.4–16.2)   | (7.9–12.1)  |
| <b>Blood Counts</b>                          |               |               |               |             |

|                                |             |             |             |             |
|--------------------------------|-------------|-------------|-------------|-------------|
| Hematocrit (L/L)               |             |             |             |             |
| Median                         | 47.2        | 55.2        | 44.4        | 33.7        |
| (Range)                        | (25.1–70.0) | (48.2–70.0) | (35.5–51.8) | (25.1–38.8) |
| Hemoglobin (g/dL)              |             |             |             |             |
| Median                         | 15.5        | 17.6        | 14.4        | 10.5        |
| (Range)                        | (7.9–22.4)  | (15.5–22.4) | (10.4–16.2) | (7.9–12.1)  |
| Leukocytes ( $\times 10^9/L$ ) |             |             |             |             |
| Median                         | 9.9         | 9.8         | 8.7         | 17.3        |
| (Range)                        | (2.8–41.0)  | (2.8–24.6)  | (5.3–41.0)  | (10.2–27.5) |
| Platelets ( $\times 10^9/L$ )  |             |             |             |             |
| Median                         | 540         | 383         | 634         | 239         |
| (Range)                        | (76–2,160)  | (89–851)    | (360–2,160) | (76–586)    |

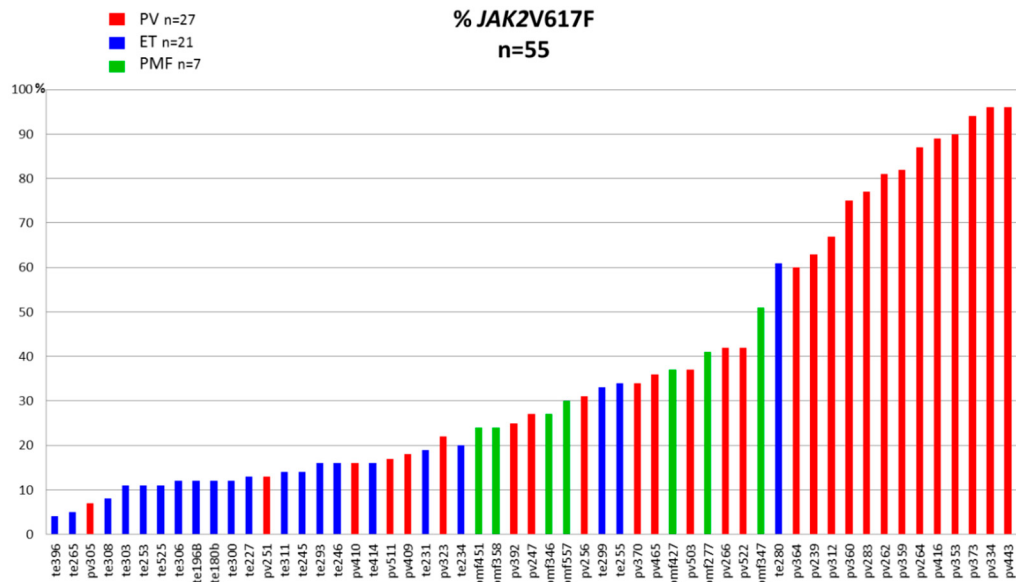

**Figure S1.** Representation of the % of *JAK2V617F*-mutated alleles of the MPN patients examined in this study.

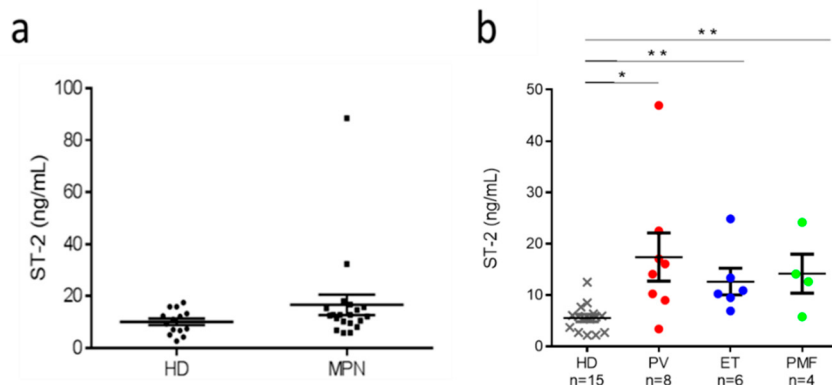

**Figure 2.** Levels of ST-2 (soluble IL-33 receptor) in MPN patients. ST-2 was measured in parallel in serum (a) and in plasma (b) of MPN patients and healthy donors (HD), as previously described (Levescot et al. 2014; Mager et al. 2018). Data are presented as means  $\pm$  SEM. (\*)  $p < 0.05$ , (\*\*)  $p < 0.01$ , Mann-Whitney  $t$ -test. Note the change in scale between (a) and (b).

## References

- Levescot, A.; Flamant, S.; Basbous, S.; Jacomet, F.; Féraud, O.; Bourgeois, E.A.; Bonnet, M.-L.; Giraud, C.; Roy, L.; Barra, A.; Chomel, J.-C.; Turhan, A.; Guilhot, F.; Girard, J.-P.; Gombert, J.-M.; Herbelin, A. BCR-ABL-induced Deregulation of the IL-33/ST2 Pathway in CD34+ Progenitors From Chronic Myeloid Leukemia Patients. *Cancer Res* **2014**, *74*, 2669–2676.
- Mager, B.L.F.; Riether, C.; Schurch, C.M.; et al. IL-33 signalling contributes to the pathogenesis of myeloproliferative neoplasms. *J Clin Invest* **2015**, *125*, 2579–2591.

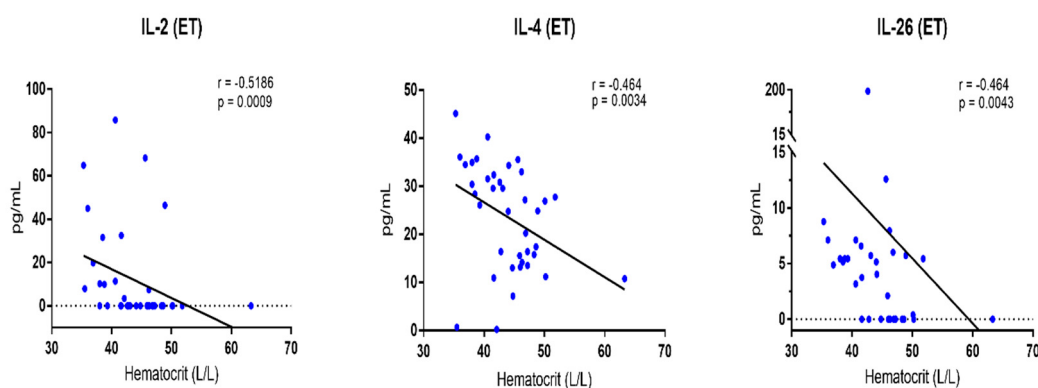

**Figure S3.** Inverse correlations between hematocrit and IL-2, IL-4 and IL-26 in ET patients. Analysis of the cytokine levels in serum and blood parameters in ET patients, using Spearman's  $t$ -test, revealed negative correlations between hematocrit and the levels of IL-2, IL-4, and IL-26.

a

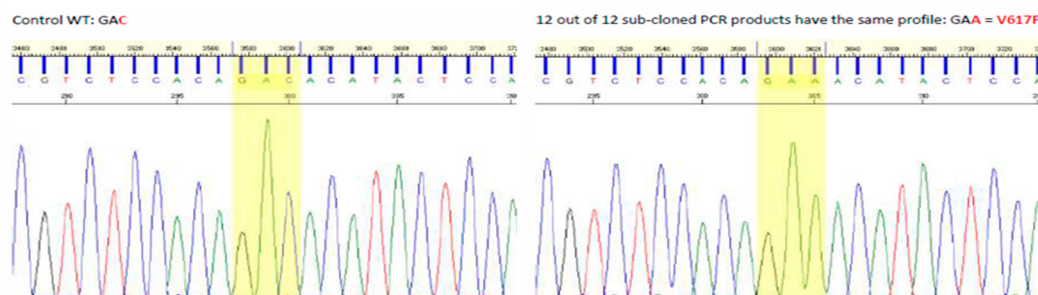

b

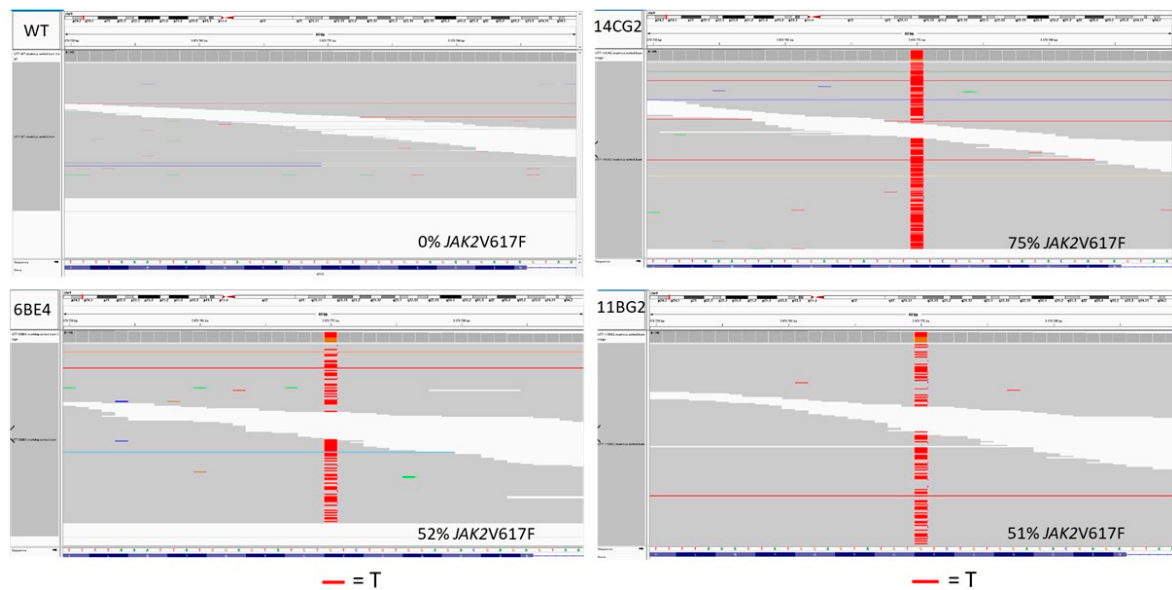

c

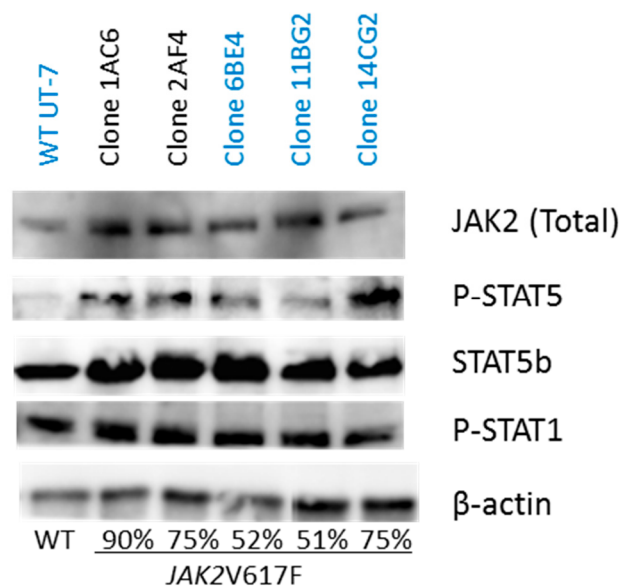

**Figure S4.** Description of UT-7 clones expressing 50% or 75% *JAK2V617F*-mutated alleles. (a) Sanger sequencing: Reverse sequencing of wild-type (WT) *JAK2* UT-7 cells (left panel) showed the expected GAC sequence of WT *JAK2* (sense sequence: GTC) whereas *JAK2V617F*-mutated UT-7 cells showed the GAA sequence corresponding to *JAK2V617F* (sense sequence: **TTC**) (right panel). (b) Whole genome sequencing: Results of *JAK2* sequencing obtained using the Integrative Genomics Viewer (IGV) (<http://software.broadinstitute.org/software/igv/>). Alleles with a sequence identical to the *JAK2* reference sequence (GTC) appear in grey (WT UT-7 cells), whereas red sequence reads correspond to a **T** mutation (TTC). The proportion of red reads is similar for UT-7 clones 6BE4 and 11BG2, and higher for clone 14CG2. The % of *JAK2V617F*-mutated alleles, quantified using allele specific qPCRs, were 52% for the 6BE4 UT-7 clone, 51% for the 11BG2 UT-7 clone, and 75% for the 14CG2 UT-7 clone. (c) *JAK2*/STAT5 pathway in UT-7 clones expressing 50% or 75% *JAK2V617F*-mutated alleles: WT *JAK2* UT-7 cells and the 3 UT-7 clones used in this study (shown in blue, expressing 51%, 52% or 75% *JAK2V617F*-mutated alleles) were grown in the presence of GM-CSF, then washed three times, numerated, seeded at  $10^5$  cells/ml in MEM with 10% FCS and a reduced dose of GM-CSF (1 ng/ml), and incubated at 37°C for 18 hrs. Cells were then collected, washed, and cell pellets were frozen at -80°C until use. Cell lysates were prepared and submitted to SDS-PAGE and transfer to PDVF

membranes, and blots were incubated with anti-human JAK2, STAT5b and  $\beta$ -actin antibodies or with anti-human phospho (P)-JAK2, P-STAT5 and P-STAT1 antibodies, then blots were revealed by chemiluminescence, as published (Cleyrat *et al.* 2010; Boissinot *et al.* 2011). JAK2V617F-expressing UT-7 clones showed higher expression of total JAK2 and increased basal tyrosine-phosphorylation of STAT5. Expression of STAT5b was similar in WT UT-7 cells and in JAK2V617F-mutated UT-7 clones. There was no increase in STAT1 tyrosine-phosphorylation in JAK2V617F-mutated UT-7 clones.

### References

- Cleyrat, C.; Jelinek, J.; Girodon, F.; Boissinot, M.; Ponge, T.; Harousseau, J.-L.; Issa, J.-P.; Hermouet, S. JAK2 mutation and disease phenotype: A double L611V/ V617F *in cis* mutation of JAK2 is associated with isolated erythrocytosis and increased activation of AKT and ERK1/2 rather than STAT5. *Leukemia* **2010**, *24*, 1069–1073.
- Boissinot, M.; Cleyrat, C.; Vilaine, M.; Jacques, Y.; Corre, I.; Hermouet S. Anti-inflammatory hepatocyte growth factor and interleukin-11 are overexpressed in Polycythemia Vera and contribute to the growth of mutated erythroblasts independently of JAK2V617F. *Oncogene* **2011**, *30*, 990–1001.

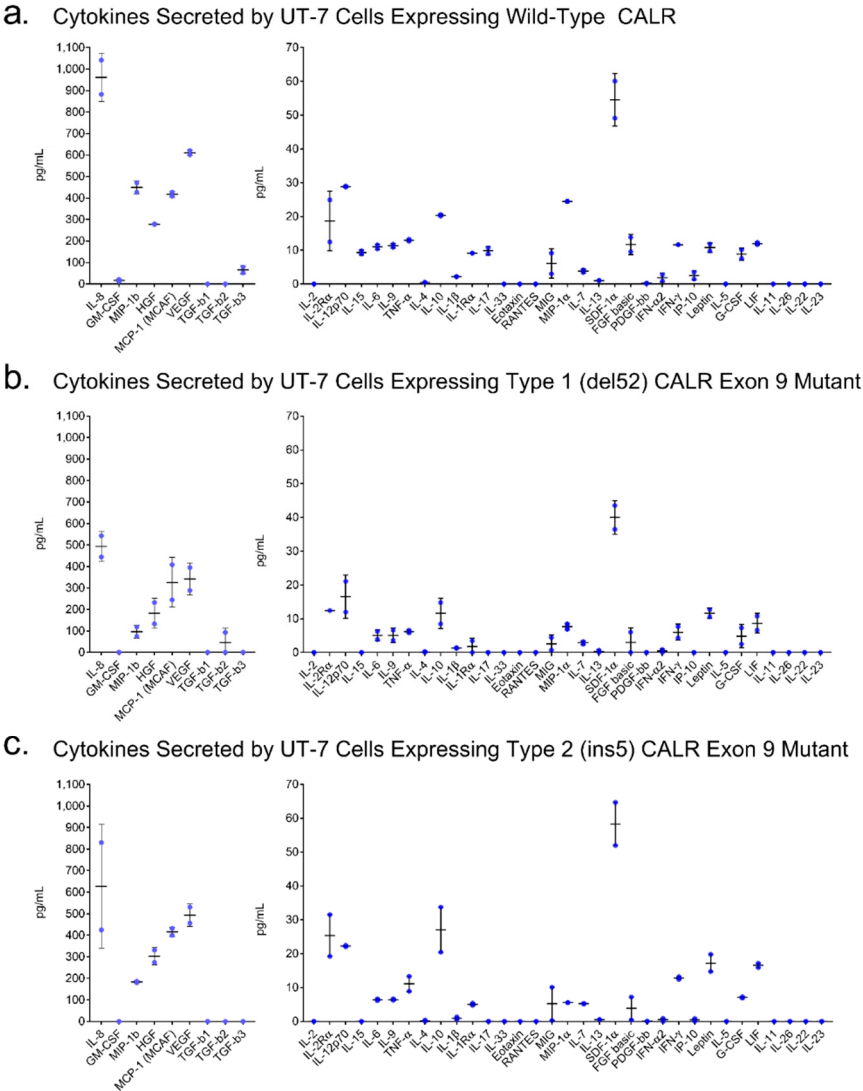

**Figure S5.** Cytokine production of CALR-mutated UT-7 cells. The basal level of 40 cytokines and chemokines and 2 soluble receptors were quantified in the supernatants of (a) wild-type CALR UT-7 cells; (b) UT-7 cells expressing type 1 (del52) CALR exon 9 mutant; (c) UT-7 cells expressing type 2 (ins5) CALR exon 9 mutant. Note that 9 cytokines were produced at high levels (left panels). Results are presented as means  $\pm$  SEM and horizontal black bars represent the mean values.

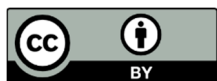

© 2020 by the authors. Submitted for possible open access publication under the terms and conditions of the Creative Commons Attribution (CC BY) license (<http://creativecommons.org/licenses/by/4.0/>).
